# Supplementary material
Source: Springer Nature journal article supplement (https://www.springermedizin.de/resource/supplementary/13051_2010_114_MOESM2_ESM.pdf/9669968)

time to event recurrence (months)

100  
80  
60  
40  
20  
0

CRP  $\leq$  5mg/L

CRP  $>$  5mg/L

CRP

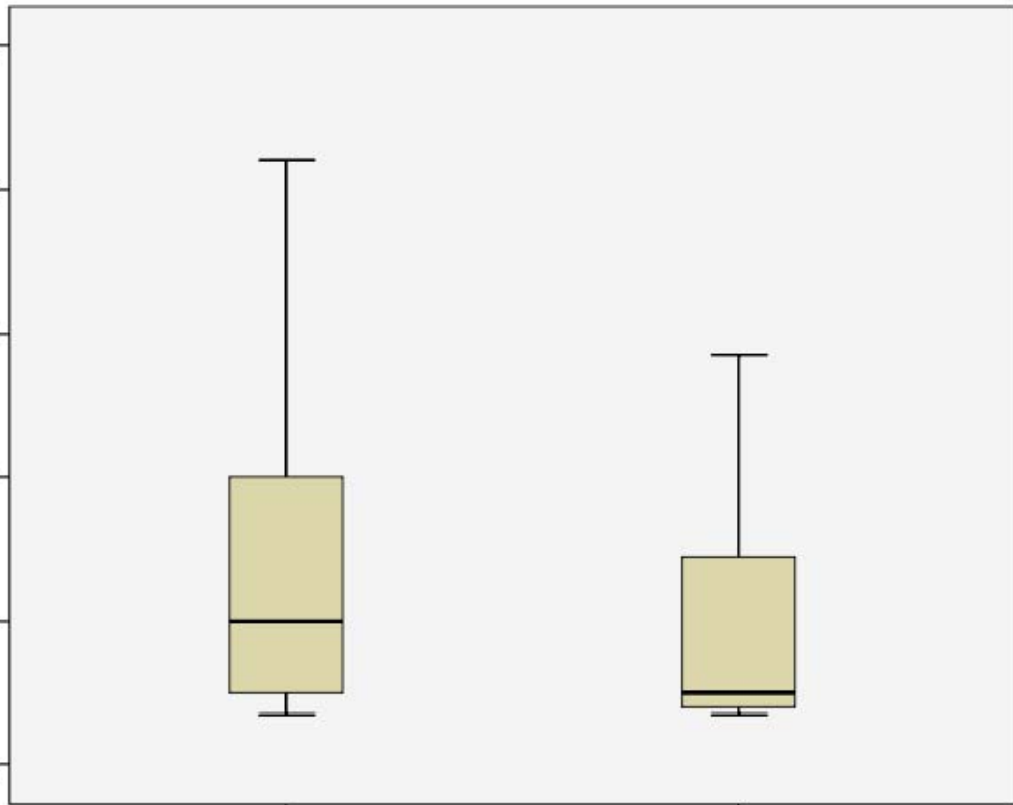

Supplement: MOESM2 [file 9669968]
